# BMP-7 Does Not Protect against Bleomycin-Induced Lung or Skin Fibrosis

Lynne A. Murray<sup>1‡\*</sup>, Tillie L. Hackett<sup>2,3</sup>, Stephanie M. Warner<sup>2,3</sup>, Furquan Shaheen<sup>2,3</sup>, Rochelle L. Argentieri<sup>1</sup>, Paul Dudas<sup>1</sup>, Francis X. Farrell<sup>1</sup>, Darryl A. Knight<sup>2,3</sup>

**1** Immunobiology Department, Tissue Remodeling and Metabolism Department, Centocor, Radnor, Pennsylvania, United States of America, **2** James Hogg iCapture Centre for Cardiovascular and Pulmonary Research, St Paul's Hospital, Vancouver, Canada, **3** Department of Anesthesiology, Pharmacology and Therapeutics, University of British Columbia, Vancouver, Canada

## Abstract

Bone morphogenetic protein (BMP)-7 is a member of the BMP family which are structurally and functionally related, and part of the TGF $\beta$  super family of growth factors. BMP-7 has been reported to inhibit renal fibrosis and TGF $\beta$ 1-induced epithelial-mesenchymal transition (EMT), in part through negative interactions with TGF $\beta$ 1 induced Smad 2/3 activation. We utilized *in vivo* bleomycin-induced fibrosis models in the skin and lung to determine the potential therapeutic effect of BMP-7. We then determined the effect of BMP-7 on TGF $\beta$ 1-induced EMT in lung epithelial cells and collagen production by human lung fibroblasts. We show that BMP-7 did not affect bleomycin-induced fibrosis in either the lung or skin *in vivo*; had no effect on expression of pro-fibrotic genes by human lung fibroblasts, either at rest or following exposure to TGF $\beta$ 1; and did not modulate TGF $\beta$ 1-induced EMT in human lung epithelial cells. Taken together our data indicates that BMP-7 has no anti-fibrotic effect in lung or skin fibrosis either *in vivo* or *in vitro*. This suggests that the therapeutic options for BMP-7 may be confined to the renal compartment.

**Citation:** Murray LA, Hackett TL, Warner SM, Shaheen F, Argentieri RL, et al. (2008) BMP-7 Does Not Protect against Bleomycin-Induced Lung or Skin Fibrosis. PLoS ONE 3(12): e4039. doi:10.1371/journal.pone.0004039

**Editor:** Oliver Eickelberg, University of Giessen Lung Center, Germany

**Received:** July 3, 2008; **Accepted:** November 21, 2008; **Published:** December 29, 2008

**Copyright:** © 2008 Murray et al. This is an open-access article distributed under the terms of the Creative Commons Attribution License, which permits unrestricted use, distribution, and reproduction in any medium, provided the original author and source are credited.

**Funding:** The work in this manuscript was supported by Centocor, Inc and operating funds from the Canadian Institutes for Health Research; the Wolfe and Gita Churg Foundation and an endowment from the Rashpal Dhillon family to DAK. The funders had no role in study design, data collection and analysis, decision to publish, or preparation of the manuscript.

**Competing Interests:** The authors have declared that no competing interests exist.

\* E-mail: lmurray@promedior.com

‡ Current address: Promedior, Inc, Malvern, Pennsylvania, United States of America

## Introduction

Heightened activation, altered phenotype and augmented synthetic activity of collagen producing cells are hallmarks of fibrosis. In the lung, fibrotic diseases such as idiopathic pulmonary fibrosis (IPF), result in reduced lung compliance and loss of alveolar architecture, which ultimately leads to organ failure and death of the afflicted individual [1, 2]. Similarly, in the skin, a significant population of people affected by diseases such as scleroderma also have substantial fibrosis of the lungs and other internal organs. The progressive decline in organ function in these diseases is pronounced and unrelenting, due, in part, to the lack of effective treatments being available.

TGF $\beta$ 1, is the prototypical pro-fibrotic cytokine and is over-expressed in fibrosis in multiple human settings and animal models [3–5]. This growth factor induces excess extracellular matrix (ECM) generation, enhanced fibroblast survival and the differentiation of fibroblasts to  $\alpha$ SMA-positive myofibroblasts, which are relatively absent from normal lungs [1–3]. Additionally, one of the more recent activities ascribed to TGF $\beta$ 1 is epithelial to mesenchymal transition (EMT) [4–6]. EMT is a dynamic process by which epithelial cells undergo phenotypic transition to motile mesenchymal cells such as fibroblasts and myofibroblasts and is accompanied by downregulation of epithelial proteins such as E-cadherin with a concomitant increase in mesenchymal cell

markers such as vimentin and EDA-fibronectin [7,8]. EMT has been observed in several experimental models of fibrosis where it has been shown to account for up to 20% of the interstitial fibroblasts [9–12]. Several recent studies have shown that EMT occurs in lung epithelial cells both *in vitro* and *in vivo*, supporting the concept of EMT contributing to the fibrosis observed in IPF [5,13,14]. However, intracellular processes that modify fibrotic pathways and EMT in particular, have not been evaluated.

Bone morphogenetic protein (BMP)-7 is a member of the BMP family which are structurally and functionally related, and part of the TGF $\beta$  superfamily of growth factors [15]. There are three type I and three type II receptors so far identified and any two of each forms a heterotetramer receptor that BMP-7 can signal through [16,17]. Binding of BMP-7 to its receptor complex results in recruitment and phosphorylation of Smad's 1, 5 and 8 [15,18], which then associate with Smad 4, translocate to the nucleus and confer gene expression [19,20]. BMP-7 has also been shown to modulate TGF $\beta$ 1 signaling, by either inhibiting Smad 2/3 phosphorylation or by direct competition for Smad 4, or both [19,20]. Accordingly, BMP-7 has also been reported to inhibit many processes involving TGF $\beta$ 1 including renal fibrosis [21], cardiac fibrosis and allograft rejection *in vivo* [22] as well as EMT and at high concentrations, endothelial cell-mesenchymal transition [22]. However, in other cells, such as hepatocytes or breast epithelial cells, BMP-7 appears to have either no effect [8] or the

opposite effect [23], suggesting some organ specificity. In the present study we sought to evaluate the role of BMP-7 in lung and skin fibrosis as well its capacity to regulate the pro-fibrotic effects of TGF $\beta$ 1 *in vitro*.

## Results

### BMP-7 does not inhibit intratracheal bleomycin-induced pulmonary fibrosis

In initial experiments we correlated collagen deposition in the lung following bleomycin administration, with the expression of TGF $\beta$ 1. Mice were treated with either bleomycin or saline as a control on day 0, with cohorts being sacrificed at days 1, 2, 4, 8, 13, 16 and 21 after intratracheal challenge. There was a significant increase in total collagen deposition observed as early as 8 days post-bleomycin which continued to increase until day 16, after which levels began to decrease (Fig. 1A). Gene transcription of TGF $\beta$ 1 followed a similar pattern of induction with significant increases being noted at day 4, continuing to a maximum after 16 days and decreasing at day 21 (Fig. 1B).

Due to the reported effects of BMP-7 inhibiting TGF $\beta$ 1 pathway, we systemically administered BMP-7 (500  $\mu$ g/kg) to mice daily for 2 weeks. This dose level is higher than previously reported to be efficacious [21]. Therefore the amount used in the *in vivo* studies were supramaximal than anticipated efficacious dose levels.

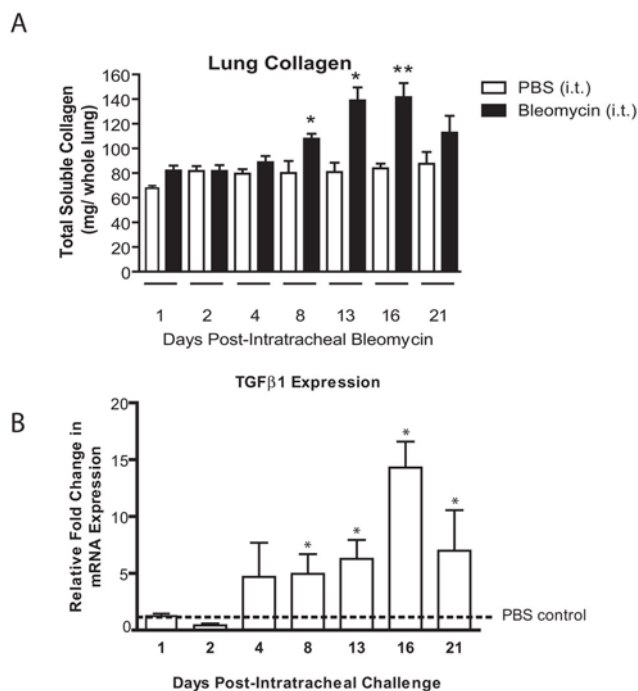

**Figure 1. Timecourse of bleomycin-induced lung fibrosis.** (A) Timecourse of induction of collagen protein generation in the lungs of mice challenged with intratracheal bleomycin (filled bars) or intratracheal PBS (open bars) as measured by the Sircol Assay (mean  $\pm$  S.E.M. of  $n=4-8$  mice/group). (B) Real-time RT-PCR analysis of TGF $\beta$ 1 (open bars) gene expression in the lungs of mice challenged with intratracheal bleomycin compared to PBS control (dotted line) at the same corresponding time points (mean value of  $n=3$  mice/group). For differences between bleomycin challenged and corresponding time point PBS control groups \* indicates  $p<0.05$ , \*\* $p<0.01$  statistical significance difference between bleomycin and corresponding time point PBS control.

doi:10.1371/journal.pone.0004039.g001

As peak collagen synthesis occurred between day 13 and 16, mice were sacrificed on day 14 and lungs analyzed for collagen production and expression of pro-fibrotic genes. As seen in Figure 2A, we found that BMP-7 had no effect on bleomycin-induced lung collagen deposition. Administration of rhBMP-7 also induced the expression of IL-6 mRNA in lung tissue (Fig. 2B). To confirm that BMP-7 did not alter the deposition of collagen or gross pathology induced by bleomycin, we also histologically analyzed lungs from all cohorts of animals. As expected, bleomycin induced disorganization of normal alveolar architecture, pronounced collagen accumulation and interstitial infiltrates. Moreover, comparable histopathology was observed in the BMP-7-treated mice (Fig. 2C). We confirmed that BMP-7 reached the lungs we stained lung sections with an anti-BMP-7 antibody (Fig. 2D). Moreover BMP-7 was biologically active in the lungs of dosed mice as we observed increased phosphorylation of Smad 1,5,8 (Fig. 2D and E). Taken together, this indicated that BMP-7 had no protective or inhibitory effect on the fibrotic response induced by intratracheal bleomycin.

### Systemic BMP-7 does not inhibit subcutaneous bleomycin-induced skin or lung collagen

Another model of fibrosis involves repeated subcutaneous delivery of bleomycin [24], which results in an experiment model of systemic sclerosis characterized by increased local skin collagen deposition, as well as a subsequent increase in pulmonary collagen deposition. This mode of bleomycin delivery results in a substantial increase in skin and lung collagen production. However, systemic rhBMP-7 treatment had no effect on the deposition of collagen at either site (Fig. 3A and B). Subcutaneous bleomycin administration also increased levels of the pro-fibrotic chemokine JE/CCL2 in both the skin and lung, and this too was not inhibited by rhBMP-7 treatment (Fig. 3C and D).

### BMP-7 has no effect on expression of profibrotic gene in human lung fibroblasts

Given that BMP-7 had little effect on indices of fibrosis *in vivo*, we asked whether BMP-7 affected fibroblast function *in vitro*. Exposure of human lung fibroblasts to TGF $\beta$ 1 (10 ng/ml) upregulated expression of procollagen I $\alpha$ 1 (Fig. 4A),  $\alpha$ SMA (Fig. 4B), CTGF (Fig. 4C) and TGF $\beta$ 1 (Fig. 4D). Treatment with rhBMP-7 at either 10 or 50 ng/ml had no effect on expression of any of these genes, either alone or following treatment with TGF $\beta$ 1 responses. We further evaluated  $\alpha$ SMA at the protein level and found that BMP-7 did not modulate baseline or TGF $\beta$ -induced  $\alpha$ SMA expression (Fig. 4E and F). Again phosphorylation of Smad 1,5,8 demonstrated that the exogenous rhBMP-7 was biologically active (Fig. 4E and F).

### BMP-7 does not affect TGF $\beta$ -induced epithelial to mesenchymal transition in lung epithelial cells

Given that there appears to be some degree of differences in organ or cell specificity to BMP-7, we determined whether rhBMP-7 could influence TGF $\beta$ 1-induced EMT in the human lung epithelial cell line A549. Incubation with TGF $\beta$ 1 at either 10 or 50 ng/ml induced phenotypic changes consistent with EMT (Fig. 5A). Morphologically the cells lost their rounded cobblestone appearance and became stellate and migratory. Exposure to TGF $\beta$ 1 also induced biochemical changes such as robust expression of the mesenchymal markers EDA fibronectin (EDA-FN) and vimentin, and a concomitant downregulation of the epithelial markers E-Cadherin and zonula occludens-1 (ZO-1) (Fig. 5B and C). Addition of rhBMP-7 alone had no obvious effect

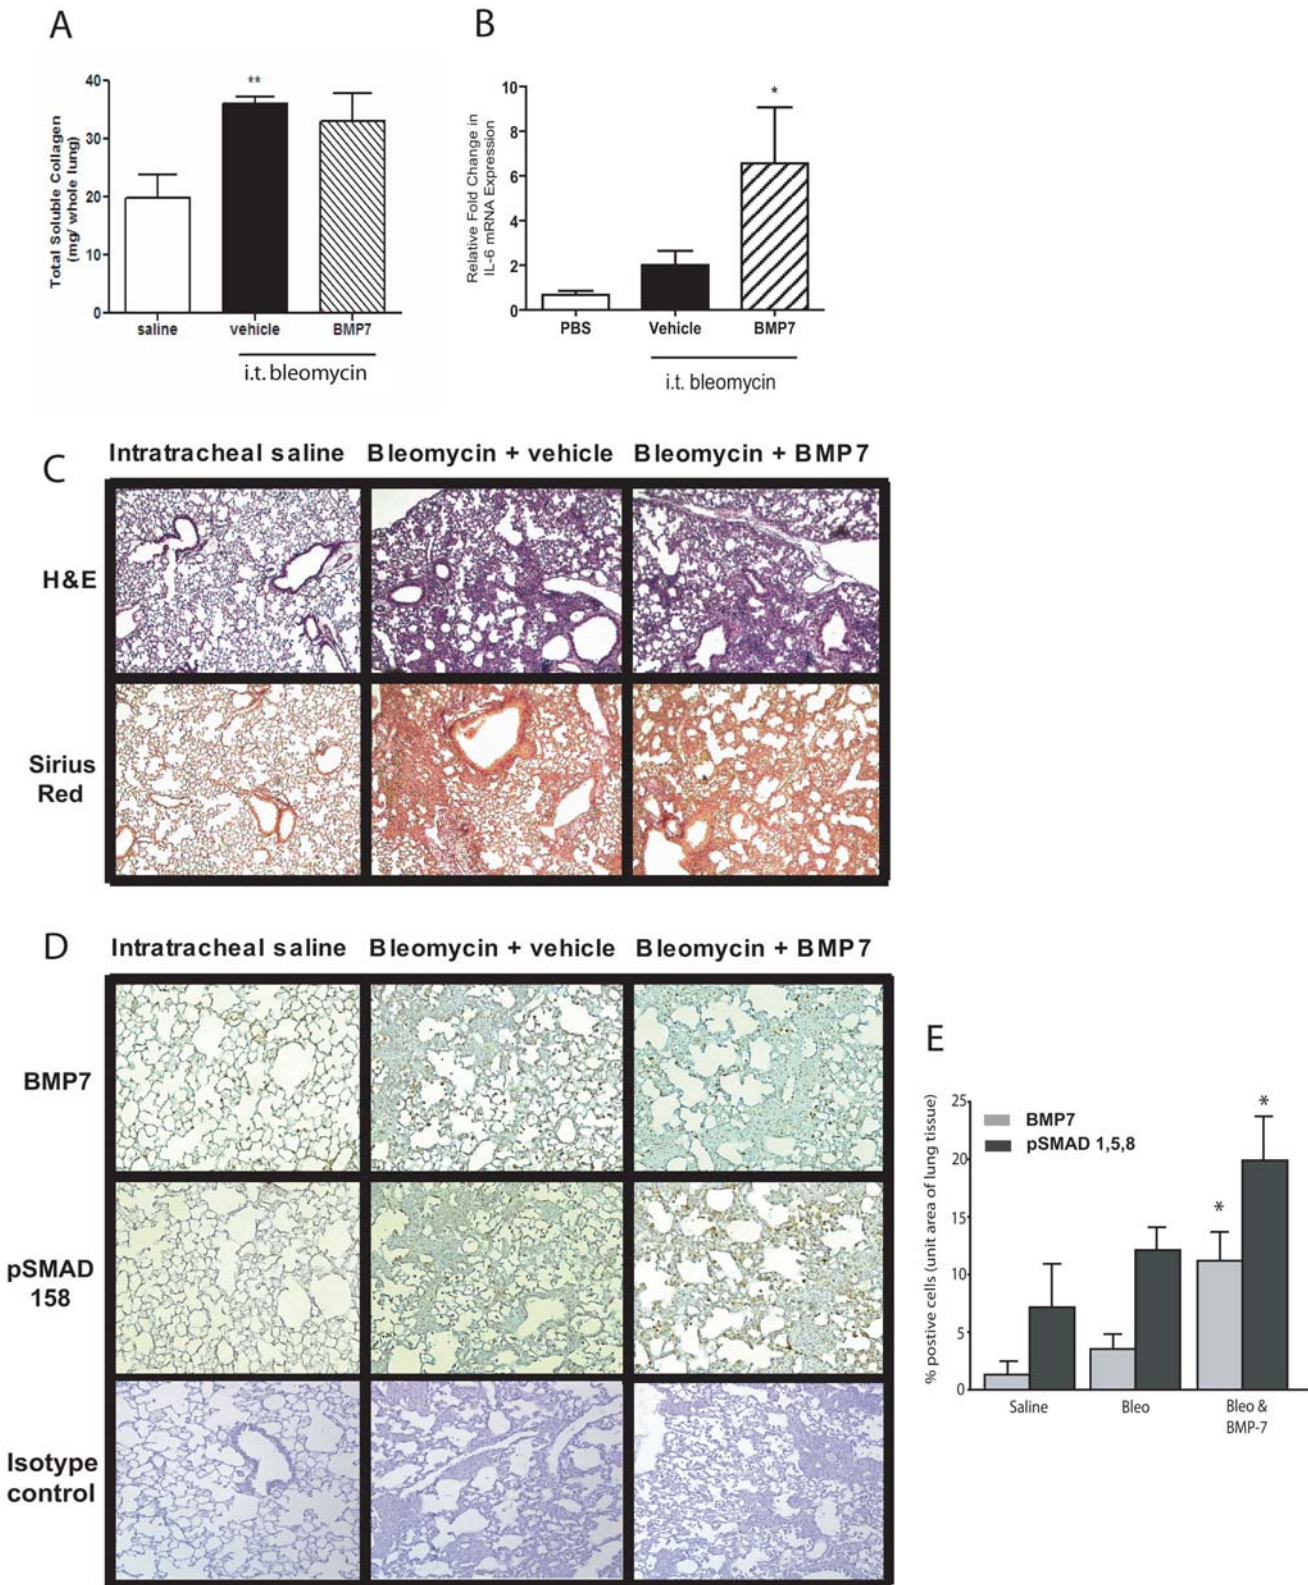

**Figure 2. BMP-7 does not inhibit intratracheal bleomycin-induced pulmonary fibrosis.** (A) Total soluble collagen levels in lung homogenates from mice challenged with bleomycin or PBS (open bars) 14 days post-intratracheal administration, and treated with vehicle (filled bars) or BMP-7 (hatched bars) daily (mean  $\pm$  S.E.M. of  $n = 5$  mice/group). (B) Real-time RT-PCR analysis of IL-6 gene expression in the lungs of mice challenged with intratracheal PBS (open bars) or bleomycin and treated daily with BMP-7 (hatched bars) or vehicle (filled bars) for 14 days (mean  $\pm$  S.E.M. of  $n = 3$  mice/group). Representative photomicrographs of sections of lungs from mice 14 days after intratracheal delivery of saline (left) or 14 days after intratracheal bleomycin and treatment with daily injections of BMP-7 (right) or vehicle control (middle). Sections are stained with (C) haematoxylin and eosin (top panels) or PicroSirius red (bottom panels); or immunostained for (D) BMP7 (top panels) or phosphor- Smad 1,5,8 (middle panels) expression or isotype control (bottom panels)

Fields viewed at  $\times 200$  magnification. (E) Quantification of immunostaining for the number of positive cells for BMP7 (grey bars) or phosphor-Smad 1,5,8 (black bars) in lung sections using image pro $\text{\textcircled{c}}$ . Bars represent mean number of positive cells  $\pm$  S.E.M. for three sections. For differences between bleomycin and corresponding PBS control, \* indicates  $p < 0.05$ , \*\* $p < 0.01$  statistical significance. doi:10.1371/journal.pone.0004039.g002

on the phenotype of A549 cells (Fig. 5A). When added at the same time as TGF $\beta$ 1, rhBMP-7 (10 or 50 ng/ml) had no effect on cell morphology or expression of EDA-FN, vimentin, ZO-1 or E-Cadherin (Fig. 5B and C). BMP-7 signaling is mediated by BMP receptor II and subsequent recruitment and phosphorylation of Smad 1, 5 and 8. To confirm that BMP-7 was active, we evaluated BMP receptor II expression and Smad 1,5,8 phosphorylation by Western blot analysis. Comparable levels of BMPRII expression were seen under all conditions (Fig. 5B and C). Furthermore, BMP-7 induced a dose-dependent increase in phosphorylation of Smad 1,5,8 in the presence or absence of TGF $\beta$ 1 (Fig. 5B and C)

confirming that BMP-7 signaling is activated following TGF $\beta$ 1 exposure. We also assessed whether BMP-7 interacted with TGF $\beta$ 1 signaling, by examining phosphorylation of Smad 3 and expression of Smad 3-dependent genes Snail-1 and Snail-2 (slug). Exposure to rhBMP-7 had no effect on TGF $\beta$ 1-induced expression of Snail-1 and -2 (Fig. 5D) or Smad 3 phosphorylation even when used at a supramaximal concentration of 500 ng/ml (data not shown). We extended these findings to evaluate the effect of rhBMP-7 on primary cultures of human bronchial epithelial cells and observed a similar phenomenon. In this setting, TGF $\beta$ 1 induced EMT as described above. In contrast, BMP-7 had no

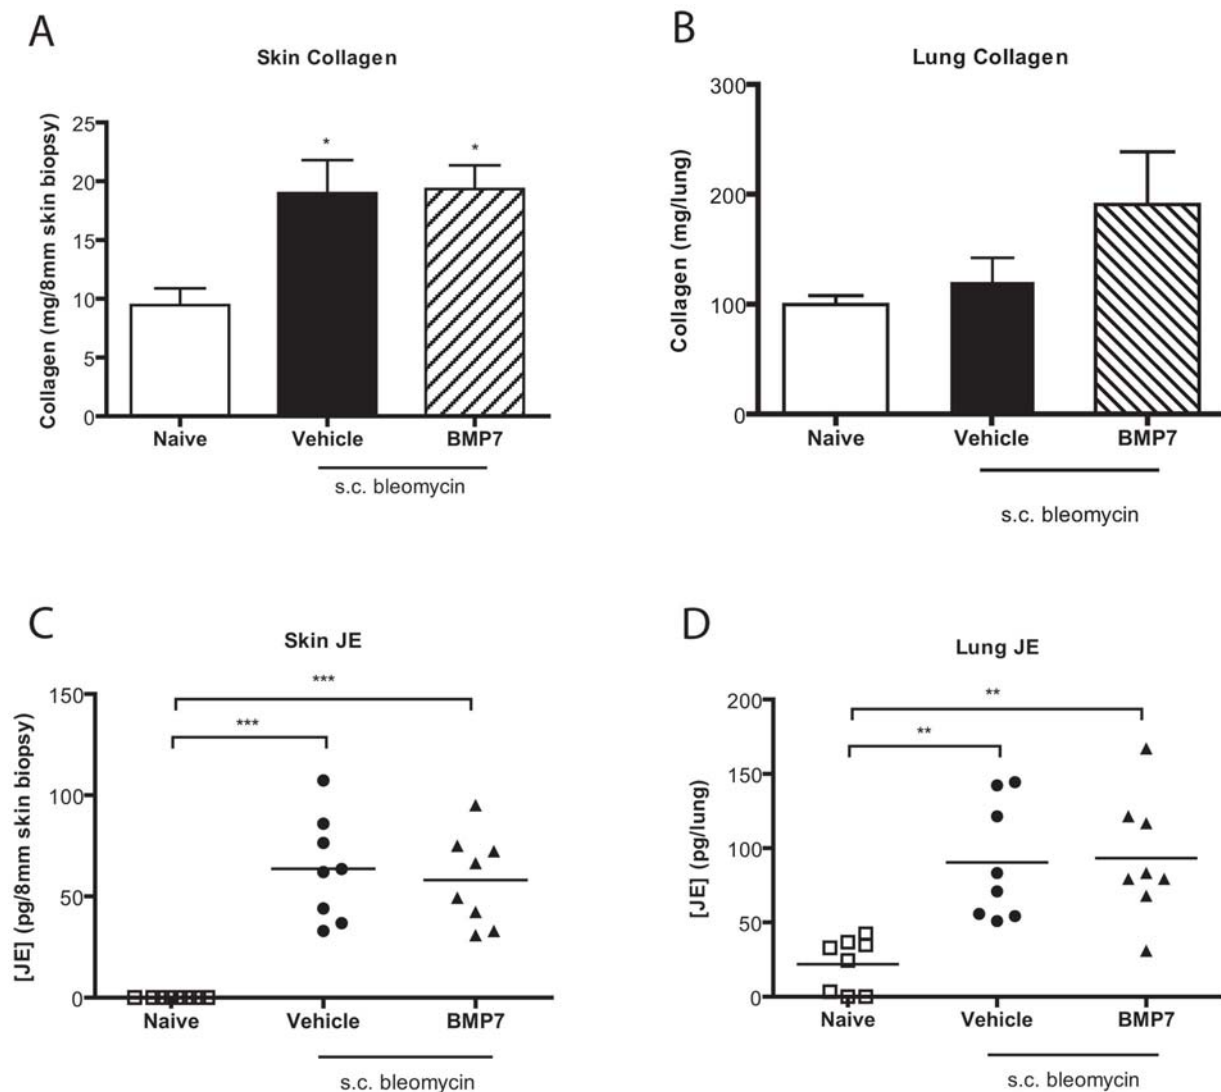

**Figure 3. BMP-7 does not inhibit subcutaneous bleomycin-induced skin and lung fibrosis.** Total collagen in the (A) skin or (B) lungs of mice challenged daily with subcutaneous bleomycin and treated daily with either BMP-7 (hatched bars) or vehicle control (filled bars) (mean  $\pm$  S.E.M. of  $n = 8$  mice/group). JE/CCL2 protein levels were measured by luminex in (C) skin and (D) lung homogenates of subcutaneous bleomycin-challenged mice. Each data point represents one animal, with bars representing the mean. For differences in Bleomycin challenged in comparison to naive control groups \* indicates  $p < 0.05$ , \*\* $p < 0.01$ , \*\*\* $p < 0.005$  statistical significance. doi:10.1371/journal.pone.0004039.g003

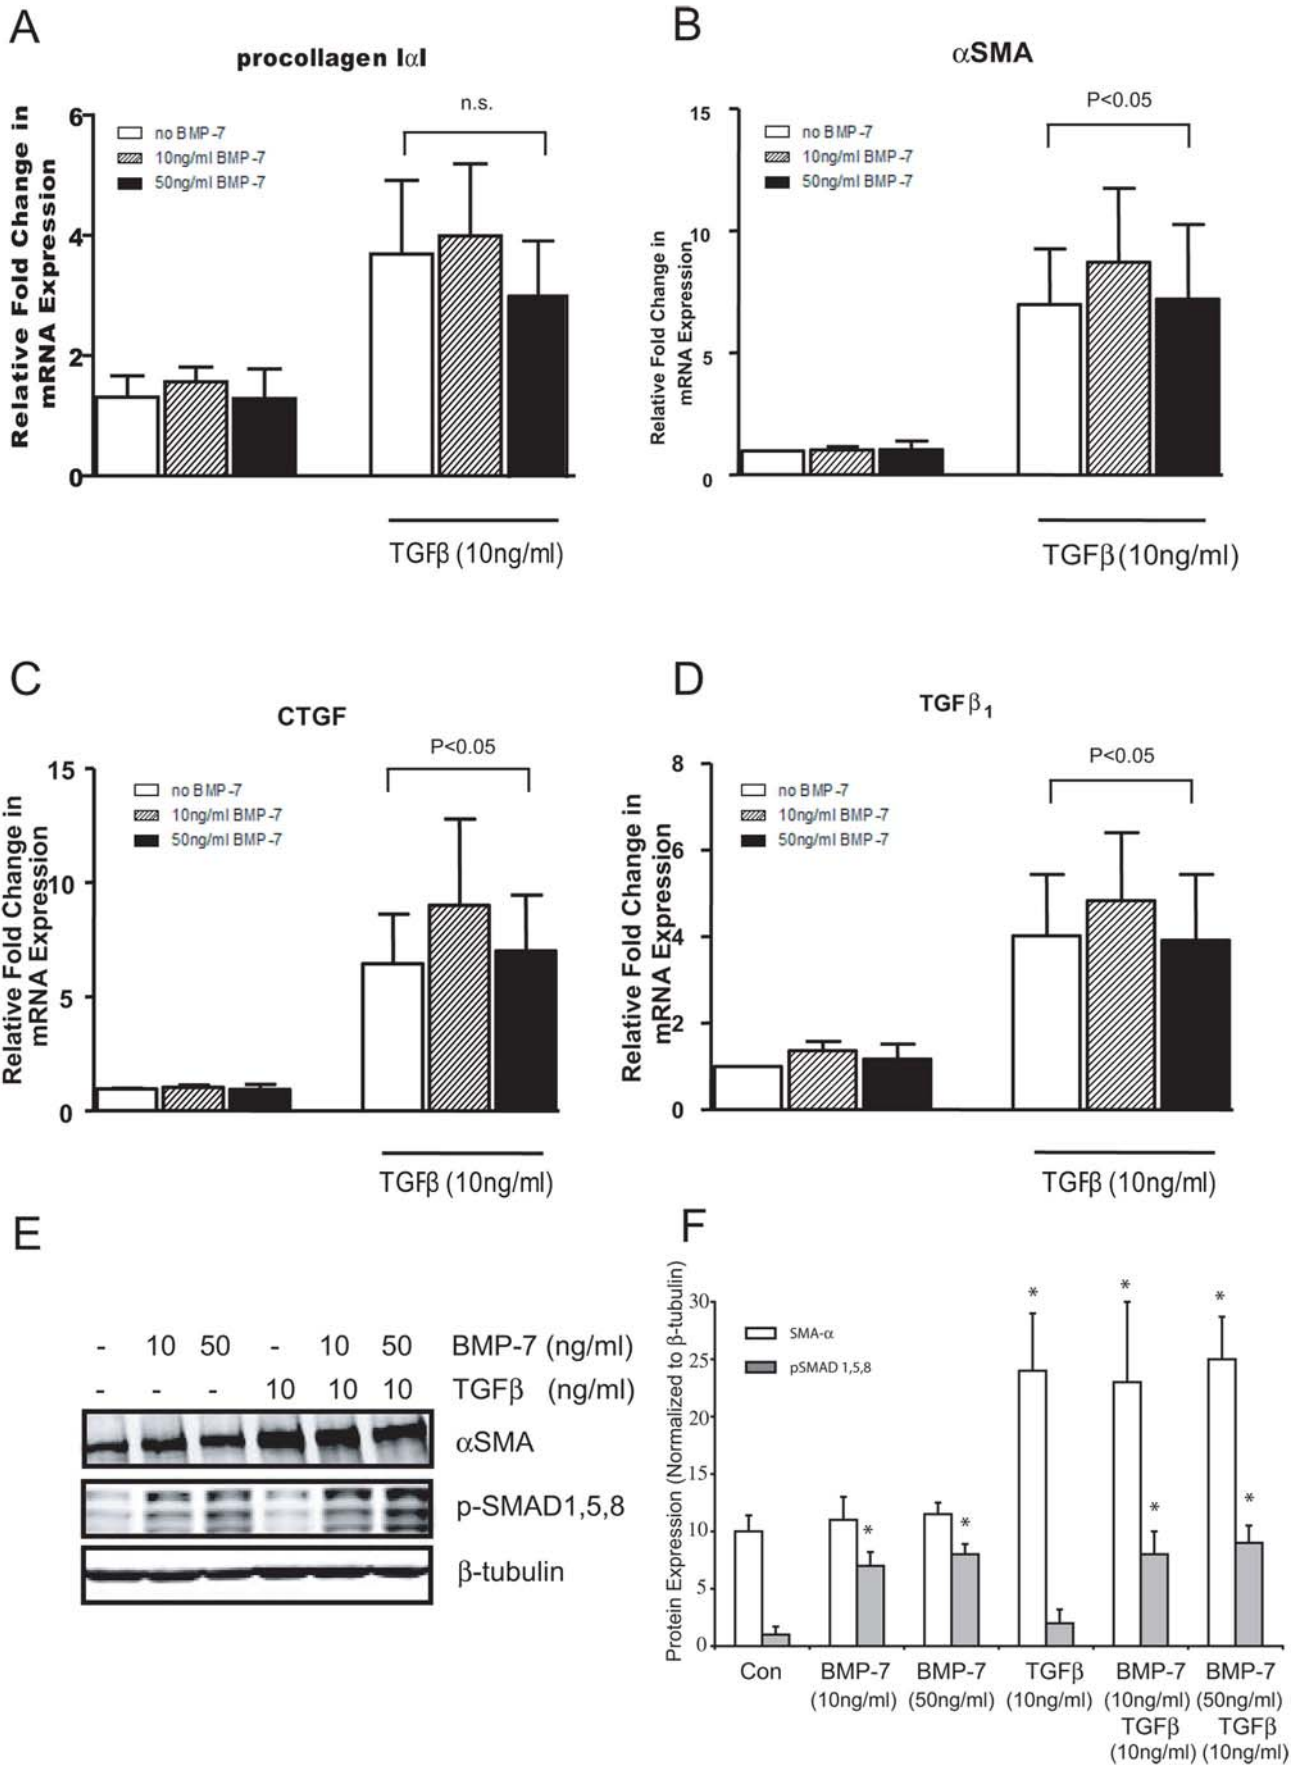

**Figure 4. BMP-7 does not inhibit TGF $\beta$ 1 induced gene expression in fibroblasts.** Primary human lung fibroblasts (n=3) were serum starved for 24 hours before incubation with rhBMP-7 at 10 or 50 ng/ml for one hour and then stimulated with rhTGF $\beta$ 1 for 24 hours. Relative changes in mRNA expression of (A) procollagen-1, (B)  $\alpha$ SMA, (C) CTGF and (D) TGF $\beta$ 1 were analyzed using real-time RT-PCR. Protein expression of  $\alpha$ SMA and phosphoSMAD 1,5,8, was (E) visualized and (F) quantitated to  $\beta$ -tubulin by Western blot analysis. \* indicates p<0.05 significant difference in comparison to unstimulated cells.  
doi:10.1371/journal.pone.0004039.g004

effect on indices of EMT and did not modify the EMT responses to TGF $\beta$ 1. This was not due to a lack of activity since we observed increased expression of phosphorylated Smad 1,5,8 in response to rhBMP-7 (Fig. 5E and F).

### Gene silencing of BMP-7 does not modulate TGF $\beta$ 1-induced EMT

To further confirm that BMP-7 does not influence TGF $\beta$ 1-induced EMT, we used siRNA to knock down endogenous BMP-7 gene expression. As seen in Figure 6A and C, BMP-7 siRNA effectively decreased expression by >75%. However, despite this level of protein suppression, A549 cells still underwent EMT as judged by changes in morphology (data not shown) as well as decreased expression of E-Cadherin and increased expression of EDA-FN following exposure to TGF $\beta$ 1 (Fig. 5B).

### Discussion

In the current study, we show that rhBMP-7: (1) did not affect bleomycin-induced fibrosis in either the lung or skin *in vivo*; (2) had no effect on expression of pro-fibrotic genes by human lung fibroblasts, either at rest or following exposure to TGF $\beta$ 1; (3) did not modulate TGF $\beta$ 1-induced EMT in human lung epithelial cells *in vitro*. Taken together, these data suggest BMP-7 has little effect on fibrosis in the lung or the skin.

Previous studies have shown that bleomycin induces collagen deposition and that TGF $\beta$ 1 plays an important role in mediating this process [3,25–27]. In keeping with these findings, we found increased TGF $\beta$ 1 expression that correlated with the increase in pulmonary collagen deposition following intra-tracheal bleomycin exposure. We also found increased BMP-7 protein expression following intratracheal bleomycin, however we hypothesized that the magnitude of BMP-7 induction is insufficient to modulate TGF $\beta$ 1 activity in the lung. Therefore, to test this hypothesis we treated mice with daily injections of rhBMP-7 after bleomycin challenge. We chose a dose greater than previously demonstrated to be efficacious in murine models of fibrosis [22]. However, despite continual treatment for 14 days, the progression of lung fibrosis was not modified, suggesting that in lung cells, the inhibitory effects of BMP-7 are absent. Further, in our study there was increased IL-6 in the lungs of rhBMP-7 treated, bleomycin-challenged mice, indicating bioactive BMP-7. Also, immunohistochemical staining of lung sections from BMP-7 treated, bleomycin challenged animals showed increased phosphorylated Smad 1,5,8, indicating intact BMP-7 signaling. Therefore BMP-7, although active, was not therapeutic in our models of lung fibrosis at the efficacious doses used in this study.

In order to further test this hypothesis, we examined whether rhBMP-7 could ameliorate skin fibrosis induced by subcutaneous administration of bleomycin. However, as was seen in the lung fibrosis model, rhBMP-7 exerted no therapeutic benefit on collagen deposition in the skin. Given that subcutaneous bleomycin also results in lung fibrosis, akin to scleroderma-associated lung fibrosis [28–30], we examined the lungs of the mice involved in the dermal fibrosis study and found fibrosis that was indistinguishable from mice not exposed to rhBMP-7. Similarly, secretion of the pro-fibrotic chemokine JE/CCL2 in

either lung or the skin was not modified by rhBMP-7. Based on this evidence we conclude that systemic BMP-7 treatment did not reduce lung or skin fibrosis.

Thus, while there is ample data to suggest that BMP-7 has potent anti-fibrotic effects on cells within the kidney [21,31], the data from our current experiments suggests that BMP-7 has little effect in modifying fibrosis in either the lung or the skin. Indeed, the anti-fibrotic effects of BMP-7 in extra-renal tissues remain controversial. For example, Valcourt and colleagues undertook an extensive analysis of TGF $\beta$ 1-induced EMT in several mouse and human epithelial cell lines [8]. The authors showed that except for  $\alpha$ SMA expression, BMP-7 was ineffective at reversing TGF $\beta$ 1 induced EMT. In our *in vivo* studies, we found that  $\alpha$ SMA was the only gene evaluated whose expression trended towards an inhibition with rhBMP-7 treatment (data not shown) and this supported this finding. Tacke and co-workers [23] recently demonstrated that BMP-7 induced collagen and fibronectin production by hepatic stellate cells and was upregulated in the cirrhotic human liver. In contrast, Maric et al., showed that in rats with inflammatory bowel disease, systemic administration of BMP-7 led to less severe colitis with preserved histology and suppression of pro-inflammatory and pro-fibrogenic genes [32]. More recently, administration of rhBMP-7 was shown to inhibit the progression of cardiac fibrosis in mouse models of pressure overload hypertrophy and chronic allograft rejection [22]. The reasons underlying these dichotomous responses are unknown at present, but clearly warrant further investigation.

The anti-fibrotic effects of BMP-7 in renal, gastrointestinal and cardiac fibrosis have been associated with the ability of this protein to attenuate TGF $\beta$ 1-induced epithelial or endothelial cell to mesenchymal cell transition [21,22,32]. We took advantage of these observations since EMT has been shown in lung epithelial cells from both mice and humans *in vitro* and also following bleomycin challenge *in vivo* [4,13]. Exposure to TGF $\beta$ 1 induced morphological characteristics of EMT, such as elongation and cell spreading and this was associated with phosphorylation of Smad 2/3. Addition of BMP-7 at 3 different concentrations was unable to modify these effects of TGF $\beta$ 1. This was not due to lack of activity since we saw robust phosphorylation of Smad 1,5,8 in response to BMP-7. To investigate the mechanisms behind this lack of effect further we used two different strategies. Firstly we examined the effect of BMP-7 on TGF $\beta$ 1-dependent Smad 2/3 activation and the Smad 3-dependent expression of Snail-1 and Snail-2. We show that BMP-7 does not influence Smad-3 phosphorylation nor the induction of Snail-1 and -2 alone or following TGF $\beta$ 1 exposure. We confirmed this finding in primary cultures of normal human bronchial epithelial cells. In these cells, addition of rhBMP-7 had no effect on epithelial cell morphology or indices of cell signaling and did not modulate TGF $\beta$ 1-induced EMT, despite inducing robust phosphorylation of Smad 1,5,8. In the final set of experiments, we used targeted siRNA to selectively knockdown BMP-7 expression. This strategy also had no effect on TGF $\beta$ 1-driven EMT. These three independent streams of data provide further evidence for a lack of effect of BMP-7 in pro-fibrotic processes in lung epithelial cells. This hypothesis of tissue specificity is reinforced by the fact that we used a similar concentration range of BMP-7 (10 and 50 ng/ml) to that used

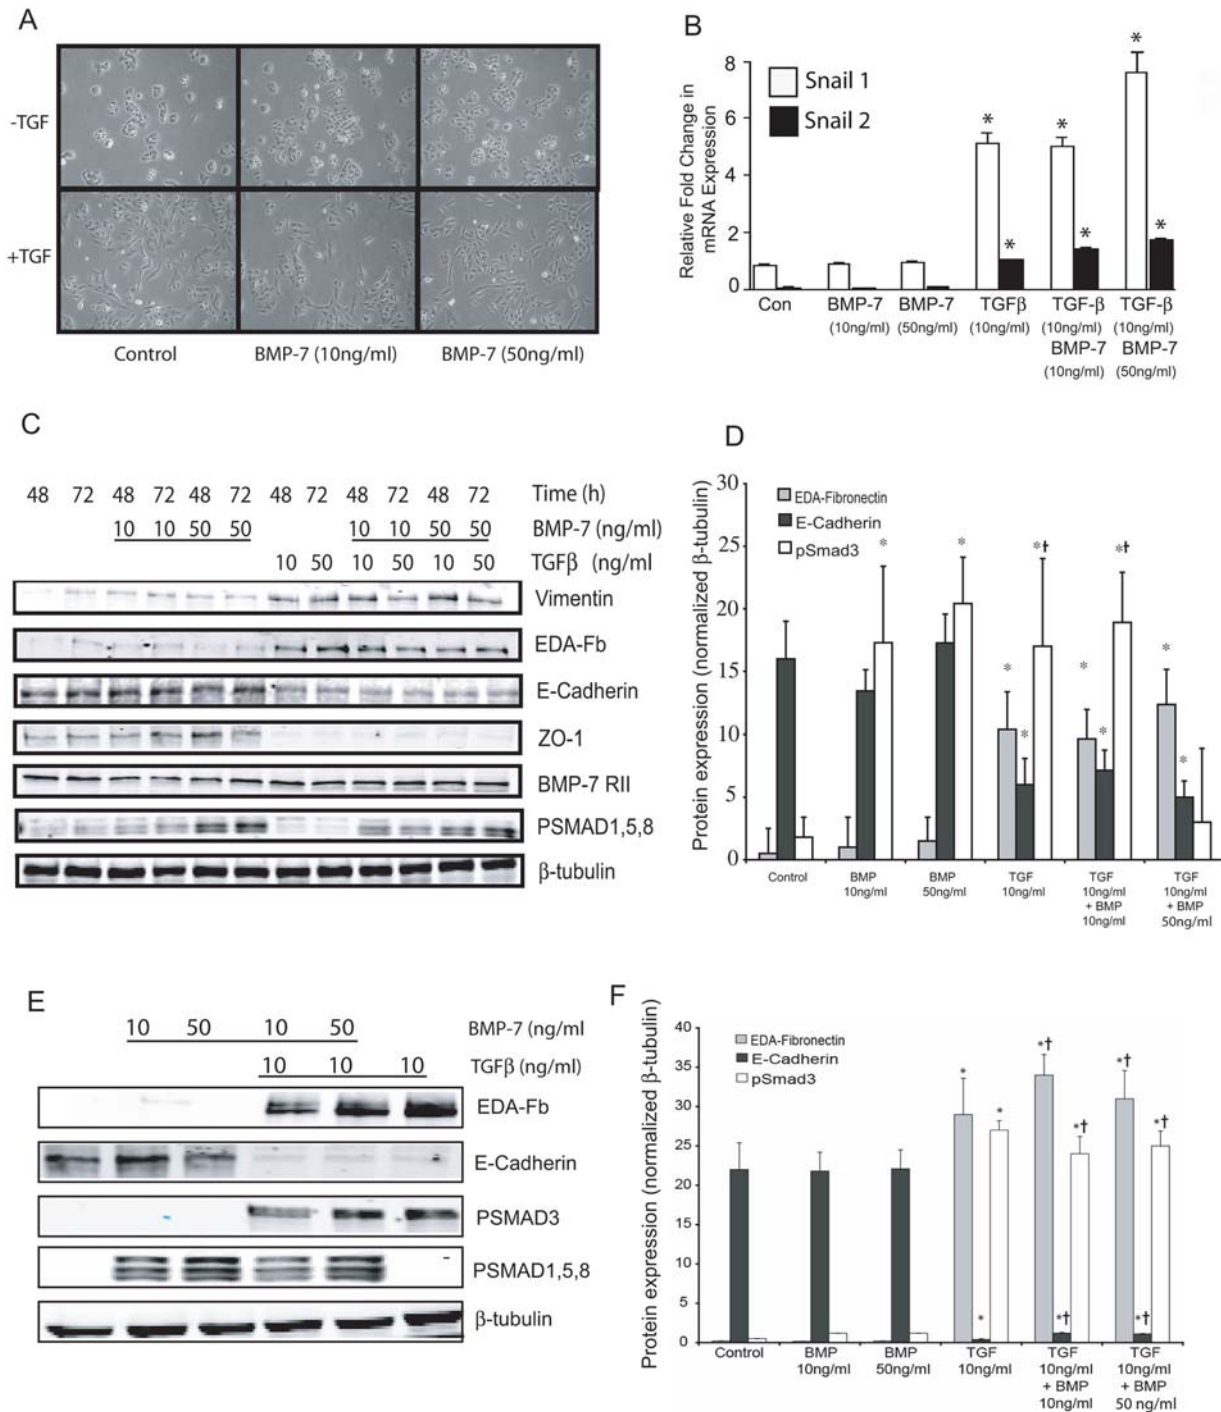

**Figure 5. BMP-7 does not inhibit TGF $\beta$ <sub>1</sub> induced EMT in A549 cells.** A549 cells (n=5) were serum starved for 24 hours before treatment with rhBMP-7 (10 or 50 ng/ml) for 24 hours followed by the presence or absence of rhTGF $\beta$ <sub>1</sub> (10 ng/ml). (A) Phenotypic changes by light microscopy were noted in A549 cells cultured in medium with 0.5% serum and TGF $\beta$ <sub>1</sub> (10 ng/ml) which were not attenuated by pre-incubation with BMP-7 at 10 or 50 ng/ml. (B) Snail-1 and Snail-2 gene expression was determined using real time RT-PCR in RNA isolated A549 cells after 48 hours of stimulation with BMP-7 (10 or 50 ng/ml) or TGF $\beta$ <sub>1</sub> (10 ng/ml) alone or in combination, experiments were run in triplicate. (C) Western blot analysis of A549 lysates for the mesenchymal markers Fibronectin-EDA and vimentin, an epithelial markers E-Cadherin and ZO-1, BMP receptor II and phospho- Smad 1, 5, 8 expression following stimulation with BMP-7 alone or in combination with TGF $\beta$ <sub>1</sub> for 48 or 72 hours.  $\beta$ -actin was used as a protein loading control. (D) Densitometric analysis of EDA-Fn  $\boxtimes$ , E-Cadherin  $\blacksquare$  and phospho- Smad 1,5,8,  $\square$  expression shown in Figure 5C. (E) Western blot analysis of normal human bronchial epithelial lysates for Fibronectin-EDA, E-cadherin, phospho Smad 3, phospho Smad 1,5,8 expression following stimulation with BMP-7 alone or in combination with TGF $\beta$ <sub>1</sub> for 72 hours.  $\beta$ -actin was used as a protein loading control. (F) Densitometric analysis of EDA-Fn  $\boxtimes$ , E-Cadherin  $\blacksquare$  and phospho- Smad 1, 5, 8  $\square$  expression shown in Figure 5E. doi:10.1371/journal.pone.0004039.g005

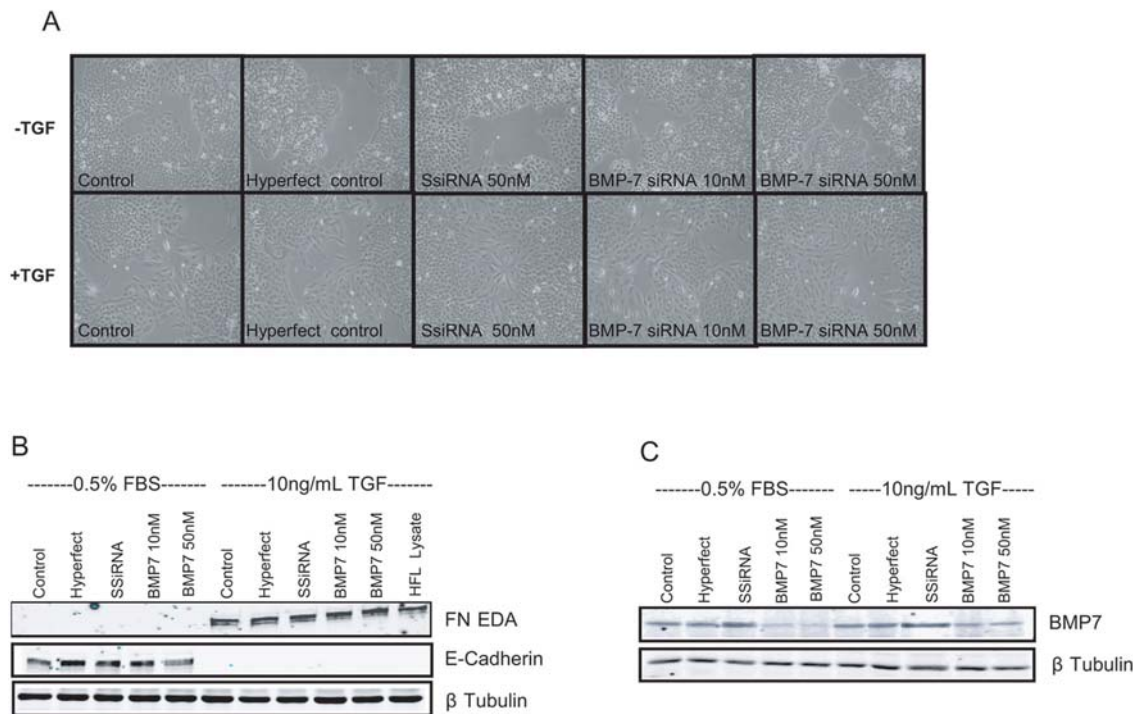

**Figure 6. BMP-7 knock-down does not augment the ability of TGF $\beta$ <sub>1</sub> to induced EMT in A549 cells.** (A) Representative photomicrographs of A549 cultures (n=3) transfected with BMP-7 siRNA (10 or 50 ng/ml), or non-silencing scrambled siRNA for 24 hours followed by the presence or absence of rhTGF $\beta$ <sub>1</sub> (10 ng/ml) for 72 hours. (B) Western blot analysis of A549 cell lysates indicated increased expression of mesenchymal marker Fibronectin-EDA and loss of epithelial marker E-Cadherin following rhTGF $\beta$ <sub>1</sub> treatment which was not enhanced following endogenous knock down of BMP-7. (C) Western blot analysis of BMP-7 showed efficient knock down of the protein following BMP-7 siRNA treatment. doi:10.1371/journal.pone.0004039.g006

by Zeisberg and colleagues [21,33] to potently inhibit EMT in proximal tubular epithelial cells (10 and 100 ng/ml). Further evidence is provided by Kalluri and colleagues [22] in which effective doses of 1000 ng/ml of BMP-7 were required to inhibit endothelial-mesenchymal transition in the heart. However in our studies, supramaximal concentration of BMP-7 (500 ng/ml) also had no modulatory effect on TGF $\beta$ <sub>1</sub>-induced EMT.

Another cell intimately linked with the development of fibrosis is the fibroblast. In these cells, TGF $\beta$ <sub>1</sub> mediates a variety of pro-fibrotic features including enhancing collagen production and growth factor synthesis [34,35]. Consistent with the epithelial cell data, BMP-7 had no effect on these cells, either alone or following TGF $\beta$ <sub>1</sub>-mediated changes in gene expression.

Taken together we have shown that BMP-7 has no anti-fibrotic effect in lung fibrosis either at the *in vivo* or *in vitro* level. This suggests that the therapeutic options for BMP-7 may be confined to the renal compartment. This is supported by the fact that BMP-7 null mice die perinatally from renal failure [36].

## Materials and Methods

### Animal models of fibrosis

All experiments were conducted under Centocor IACUC regulations and protocols. Female C57Bl/6 mice (6–8 wk old) were purchased from ACE Laboratories (Boyertown, PA, USA). Mice were maintained in specific pathogen-free conditions and provided with food and water *ad libitum*. To induce intratracheal bleomycin-induced pulmonary fibrosis, mice were treated with intratracheal bleomycin (Blenoxane, Sigma, St. Louis, MO) on day 0, as previously described [37,38]. Briefly, mice were anesthetized by intraperitoneal injection of 250  $\mu$ l of 12.5 mg/ml ketamine followed by intratracheal instillation of 0.04 U of

bleomycin in 50  $\mu$ l of sterile PBS. Mice were analyzed for up to 21 days after bleomycin administration. Control animals received intratracheal sterile saline. For the studies evaluating the effect of BMP-7 on bleomycin-induced lung fibrosis, animals challenged with bleomycin were separated into two groups where they received vehicle control (20 mM acetate, pH 4.5 and 5% mannitol) or BMP-7 (500  $\mu$ g/kg, i.p.). For the subcutaneous bleomycin-induced skin and lung fibrosis model, mice backs were shaved and bleomycin administered subcutaneously daily for over 2 weeks. Control mice were injected daily with BMP-7 (500  $\mu$ g/kg, i.p) or vehicle control (20 mM acetate, pH 4.5 and 5% mannitol) or PBS in the same anatomical site as the bleomycin mice. BMP-7 is well conserved between mouse and man (98% at the amino acid level [39]). Further, the recombinant human form has been used in several previous studies using murine models. Therefore in the present study, as in prior *in vivo* studies, we utilized human BMP-7 in our mouse models.

### Histology

Lungs were perfused *in situ* through the right ventricle with saline and then inflated under a constant pressure of 30 cm H<sub>2</sub>O with 1 ml of 10% normal buffered formalin (NBF). Lungs were ligated at the trachea, removed *en bloc*, and immersed in NBF for 24 hr. After which, tissue samples were changed to 70% alcohol before paraffin embedding, followed by sectioning, hematoxylin and eosin or Sirius Red staining. Sections were examined using a Fisher Scientific Micromaster inverted microscope and camera (Pittsburgh, PA, USA). For immunohistochemical analysis, five slides from each group containing 3 mice were stained separately to identify BMP-7 and phospho-Smad 1, 5, 8. Sections were deparaffinized and rehydrated, and subject to antigen retrieval



Subsequently, endogenous peroxidase was quenched with 3% H<sub>2</sub>O<sub>2</sub> and blocked for 20 min with 50% goat serum. Primary mouse anti human BMP-7 (rabbit polyclonal, abcam, Cambridge, MA) and phospho- Smad 1,5,8 (rabbit polyclonal, Cell Signaling Technology, Denver, MA) or isotype control (normal rabbit IgG, Santa Cruz Biotechnologies, Santa Cruz, CA) were added overnight at 4°C in 25% goat serum. Sections were then incubated with a biotinylated goat anti-rabbit secondary antibody (Vector Labs Burlingame, CA) for 60 min followed by a 10 min treatment with Streptavidin-HRP (Dako, Mississauga, ON). The antigen of interest was visualized by using the brown chromogen 3,3'-diaminobenzidine (Dako, Mississauga, ON) and counterstained with Harris Hematoxylin Solution (Sigma, Oakville, ON). Sections were then dehydrated and mounted with Cytoseal 60 (Richard-Allan Scientific, Kalamazoo, MI). Antibody dilutions and all washes were in TRIS-buffered saline solution.

For analysis all images were viewed and captured at 200× magnification. Five randomly selected digital 425×425 micron fields per slide were obtained with the use of a light microscope (Nikon Microphoto) equipped with a digital camera (JVC3-CCD KY F-70, Diagnostic Instruments). The same field was used to identify total cells and cells expressing BMP-7 and phospho-Smad 1,5,8. Image analysis was performed using Image-Pro Plus (Media Cybernetics, Silver Spring, Maryland).

### Tissue preparation for protein and RNA analyses

For protein analysis, lungs from all groups of mice were homogenized in complete protease inhibitor (Roche Diagnostics Corp, Indianapolis, Indiana, USA) as previously described [37]. Homogenates were centrifuged at 900×g for 10 minutes and frozen at -80°C until time of analysis. For RNA analysis, lungs were removed, homogenized in PBS and RNA was isolated using RNeasy Plus Mini-Kits (QIAGEN, Valencia, CA). Purified RNA was treated with DNase and reverse transcribed into cDNA using TaqMan® Reverse Transcription Reagents (Applied Biosystems, Foster City, CA). Gene expression was determined by real-time PCR using the Taqman® Universal PCR Master Mix (Applied Biosystems) and pre-developed Taqman® Gene Expression Assays designed by Applied Biosystems, *as per* manufacturer's instructions. Fold induction was determined after calibration of the gene of interest with 18S rRNA and normalization to either saline control gene expression or for the effect of BMP-7 treatment, after normalization to vehicle control bleomycin-challenged mice.

For skin fibrosis studies, on the day after the final bleomycin injection, the skin at the injection site was removed by using an 8 mm dermal biopsy punch (Miltex, York PA) and processed for protein or RNA as described above.

### Sircol Collagen assay

The Sircol collagen assay (Biocolor Ltd., Belfast, Ireland) was performed following the manufacturer's instructions [40]. Briefly, Sirius red reagent was added to each lung homogenate (50 µl) and mixed for 30 minutes at room temperature. The collagen-dye complex was precipitated by centrifugation at 16,000 g for 5 minutes and the pellet was resuspended in 1 ml of 0.5 M NaOH. The concentration of collagen in each sample was measured as absorbance at 540 nm and values extrapolated from a known standard curve *as per* manufacturer's instructions. Chemokine levels were measured using luminex technology (Biosource, Invitrogen, Carlsbad, CA).

### Fibroblast and epithelial protein and gene expression

Pulmonary fibroblasts were isolated from lung tissue obtained from human transplant donor lungs deemed unsuitable for

transplantation (n = 4) and donated for medical research obtained through the International Institute for the Advancement of Medicine (Edison, NJ). The ethic committees of the involved institutions approved this study. All fibroblast cell lines were isolated by serial passaging and purity assessed using morphological and immunohistochemical staining as previously described [41]. Fibroblasts were plated into 6 well plates (Costar, Corning, NY) at 1×10<sup>5</sup> cells/well and allowed to adhere for 8 hours. The cells were then washed with PBS and cultured overnight in serum free DMEM media containing 1% penicillin and 1% streptomycin at 37°C in 5% CO<sub>2</sub>/air. Cells were then stimulated with or without recombinant human BMP-7 (rhBMP-7; RnDSystems, Minneapolis, USA) or TGFβ<sub>1</sub> (Santa Cruz Biotechnology, USA), or both combined at 10 and 50 nM concentrations for 24 hrs. Supernatants were removed and RNA was subsequently isolated and analyzed by real-time PCR as described above. Here, fold induction was determined after calibration of the gene of interest with 18S rRNA and normalized to corresponding unstimulated cells. Epithelial Snail 1 and Snail 2 gene expression was evaluated in A549 cells stimulated with BMP-7 or TGFβ<sub>1</sub> alone or in combination. Protein levels of αSMA and phospho- Smad 1,5,8 were analyzed by Western analysis and normalized to β-tubulin which served as the loading control.

### EMT Analysis

Experiments were performed in the A549 cell line and normal bronchial epithelial cells (NHBE; Lonza Canada Inc, Shawinigan, NY). A549 cells were grown in DMEM containing 10% fetal bovine serum and NHBE cells grown in bronchial epithelial growth media (BEGM, Cambrex, Lonza Canada Inc). All cultures were maintained at 37°C, 5% CO<sub>2</sub>/air. Prior to each experiment, cells were incubated in respective serum free media for 24 hrs. A549 and NHBE cells were then incubated with or without rhBMP-7 or TGFβ<sub>1</sub> or both combined at 10 and 50 nM concentrations for 48 and 72 hrs. Following this, cells were lysed in complete protease inhibitor (Roche Diagnostics Corp). Lysates at a concentration of 50 ng/ml were then electrophoresed in SDS-polyacrylamide gels, electrotransferred to nitrocellulose, and membranes underwent Western analysis with antibodies directed against fibronectin-EDA (MAB1940, Chemicon International, Temecula, USA), E-Cadherin (Clone G 10, Santa Cruz Biotechnology, USA); phospho- Smad 1,5, & 8, (AB3848) BMP receptor II (MAB3551), and rhBMP-7 (RnD Systems). β-tubulin (Upstate, Lake Placid, NY) was used and protein loading control.

### BMP-7 knock-down with SiRNA

A549 cells grown to 50% confluence in six well plates were transfected with ON-TARGET plus SMART pool BMP-7 SiRNA (Dharmacon, Chicago, USA) or non-silencing control siRNA at a final concentration of 10 or 50 nM using Hyperfect (Quiagen, USA) in DMEM containing 10% fetal bovine serum at 37°C, 5% CO<sub>2</sub>. After 24 hrs, cells were incubated in DMEM containing 0.5% serum for a further 24 hrs, and then incubated with TGFβ<sub>1</sub> at 10 nM for 48 hrs. Cells were then lysed and analyzed by Western blot as above.

### Statistical analysis

All statistical analysis were calculated using GraphPad Prism software (San Diego, CA). All statistical comparisons were performed using nonparametric Mann Whitney t-test. Data was considered significant if p<0.05, p<0.01 or p<0.005, which is referred to as \*, \*\* or \*\*\* respectively.

## Author Contributions

Conceived and designed the experiments: LAM TLH DAK. Performed the experiments: LAM TLH SMW FS RLA. Analyzed the data: LAM

TLH SMW FS RLA. Wrote the paper: LAM DAK. Intellectual input and review of manuscript: PD FXF.

## References

- Evans RA, Tian YC, Steadman R, Phillips AO (2003) TGF-beta1-mediated fibroblast-myofibroblast terminal differentiation-the role of Smad proteins. *Exp Cell Res* 282: 90–100.
- Zhang HY, Gharace-Kermani M, Zhang K, Karmioli S, Phan SH (1996) Lung fibroblast alpha-smooth muscle actin expression and contractile phenotype in bleomycin-induced pulmonary fibrosis. *Am J Pathol* 148: 527–537.
- Gu L, Zhu YJ, Yang X, Guo ZJ, Xu WB, et al. (2007) Effect of TGF-beta/Smad signaling pathway on lung myofibroblast differentiation. *Acta Pharmacol Sin* 28: 382–391.
- Jain R, Shaul PW, Borok Z, Willis BC (2007) Endothelin-1 induces alveolar epithelial-mesenchymal transition through endothelin type A receptor-mediated production of TGF-beta1. *Am J Respir Cell Mol Biol* 37: 38–47.
- Kasai H, Allen JT, Mason RM, Kamimura T, Zhang Z (2005) TGF-beta1 induces human alveolar epithelial to mesenchymal cell transition (EMT). *Respir Res* 6: 56.
- Willis BC, Borok Z (2007) TGF-beta-induced EMT: mechanisms and implications for fibrotic lung disease. *Am J Physiol Lung Cell Mol Physiol* 293: L525–534.
- Willis BC, Borok Z (2007) TGF-beta-induced EMT: mechanisms and implications for fibrotic lung disease. *Am J Physiol Lung Cell Mol Physiol*.
- Valcourt U, Kowanzet M, Niimi H, Heldin CH, Moustakas A (2005) TGF-beta and the Smad signaling pathway support transcriptional reprogramming during epithelial-mesenchymal cell transition. *Mol Biol Cell* 16: 1987–2002.
- Okada H, Danoff TM, Kalluri R, Neilson EG (1997) Early role of Fsp1 in epithelial-mesenchymal transformation. *Am J Physiol* 273: F563–574.
- Iwano M, Plieth D, Danoff TM, Xue C, Okada H, et al. (2002) Evidence that fibroblasts derive from epithelium during tissue fibrosis. *J Clin Invest* 110: 341–350.
- Kalluri R, Neilson EG (2003) Epithelial-mesenchymal transition and its implications for fibrosis. *J Clin Invest* 112: 1776–1784.
- Saika S, Kono-Saika S, Ohnishi Y, Sato M, Muragaki Y, et al. (2004) Smad3 Signaling Is Required for Epithelial-Mesenchymal Transition of Lens Epithelium after Injury. *Am J Pathol* 164: 651–663.
- Kim KK, Kugler MC, Wolters PJ, Robillard L, Galvez MG, et al. (2006) Alveolar epithelial cell mesenchymal transition develops in vivo during pulmonary fibrosis and is regulated by the extracellular matrix. *Proc Natl Acad Sci U S A* 103: 13180–13185.
- Willis BC, Liebler JM, Luby-Phelps K, Nicholson AG, Crandall ED, et al. (2005) Induction of epithelial-mesenchymal transition in alveolar epithelial cells by transforming growth factor-beta1: potential role in idiopathic pulmonary fibrosis. *Am J Pathol* 166: 1321–1332.
- Eickelberg O, Morty RE (2007) Transforming growth factor beta/bone morphogenic protein signaling in pulmonary arterial hypertension: remodeling revisited. *Trends Cardiovasc Med* 17: 263–269.
- Derynck R, Feng XH (1997) TGF-beta receptor signaling. *Biochim Biophys Acta* 1333: F105–150.
- Feng XH, Derynck R (2005) Specificity and versatility in tgf-beta signaling through Smads. *Annu Rev Cell Dev Biol* 21: 659–693.
- Wordinger RJ, Clark AF (2007) Bone morphogenetic proteins and their receptors in the eye. *Exp Biol Med* (Maywood) 232: 979–992.
- Massague J (2000) How cells read TGF-beta signals. *Nat Rev Mol Cell Biol* 1: 169–178.
- Wrana JL (2000) Regulation of Smad activity. *Cell* 100: 189–192.
- Zeisberg M, Hanai J, Sugimoto H, Mammoto T, Charytan D, et al. (2003) BMP-7 counteracts TGF-beta1-induced epithelial-to-mesenchymal transition and reverses chronic renal injury. *Nat Med* 9: 964–968.
- Zeisberg EM, Tarnavski O, Zeisberg M, Dorfman AL, McMullen JR, et al. (2007) Endothelial-to-mesenchymal transition contributes to cardiac fibrosis. *Nat Med* 13: 952–961.
- Tacke F, Gabele E, Bataille F, Schwabe RF, Hellerbrand C, et al. (2007) Bone morphogenetic protein 7 is elevated in patients with chronic liver disease and exerts fibrogenic effects on human hepatic stellate cells. *Dig Dis Sci* 52: 3404–3415.
- Matsushita M, Yamamoto T, Nishioka K (2004) Upregulation of interleukin-13 and its receptor in a murine model of bleomycin-induced scleroderma. *Int Arch Allergy Immunol* 135: 348–356.
- Cutroneo KR, White SL, Phan SH, Ehrlich HP (2007) Therapies for bleomycin induced lung fibrosis through regulation of TGF-beta1 induced collagen gene expression. *J Cell Physiol* 211: 585–589.
- Higashiyama H, Yoshimoto D, Okamoto Y, Kikkawa H, Asano S, et al. (2007) Receptor-activated Smad localisation in bleomycin-induced pulmonary fibrosis. *J Clin Pathol* 60: 283–289.
- Wu Z, Yang L, Cai L, Zhang M, Cheng X, et al. (2007) Detection of epithelial to mesenchymal transition in airways of a bleomycin induced pulmonary fibrosis model derived from an alpha-smooth muscle actin-Cre transgenic mouse. *Respir Res* 8: 1.
- Lakos G, Melichian D, Wu M, Varga J (2006) Increased bleomycin-induced skin fibrosis in mice lacking the Th1-specific transcription factor T-bet. *Pathobiology* 73: 224–237.
- Lakos G, Takagawa S, Chen SJ, Ferreira AM, Han G, et al. (2004) Targeted disruption of TGF-beta/Smad3 signaling modulates skin fibrosis in a mouse model of scleroderma. *Am J Pathol* 165: 203–217.
- Yamamoto T, Eckes B, Krieg T (2000) Bleomycin increases steady-state levels of type I collagen, fibronectin and decorin mRNAs in human skin fibroblasts. *Arch Dermatol Res* 292: 556–561.
- Zeisberg M, Shah AA, Kalluri R (2005) Bone morphogenetic protein-7 induces mesenchymal to epithelial transition in adult renal fibroblasts and facilitates regeneration of injured kidney. *J Biol Chem* 280: 8094–8100.
- Maric I, Poljak L, Zoricic S, Bobinac D, Boskondra D, et al. (2003) Bone morphogenetic protein-7 reduces the severity of colon tissue damage and accelerates the healing of inflammatory bowel disease in rats. *J Cell Physiol* 196: 258–264.
- Zeisberg M, Yang C, Martino M, Duncan MB, Rieder F, et al. (2007) Fibroblasts derive from hepatocytes in liver fibrosis via epithelial to mesenchymal transition. *J Biol Chem* 282: 23337–23347.
- Gauldie J, Bonniaud P, Sime P, Ask K, Kolb M (2007) TGF-beta, Smad3 and the process of progressive fibrosis. *Biochem Soc Trans* 35: 661–664.
- Vallance BA, Gunawan MI, Hewlett B, Bercik P, Van Kampen C, et al. (2005) TGF-beta1 gene transfer to the mouse colon leads to intestinal fibrosis. *Am J Physiol Gastrointest Liver Physiol* 289: G116–128.
- Karsenty G, Luo G, Hofmann C, Bradley A (1996) BMP 7 is required for nephrogenesis, eye development, and skeletal patterning. *Ann N Y Acad Sci* 785: 98–107.
- Burdick MD, Murray LA, Keane MP, Xue YY, Zisman DA, et al. (2005) CXCL11 attenuates bleomycin-induced pulmonary fibrosis via inhibition of vascular remodeling. *Am J Respir Crit Care Med* 171: 261–268.
- Keane MP, Belperio JA, Arenberg DA, Burdick MD, Xu ZJ, et al. (1999) IFN-gamma-inducible protein-10 attenuates bleomycin-induced pulmonary fibrosis via inhibition of angiogenesis. *J Immunol* 163: 5686–5692.
- Ozkaynak E, Schnegelsberg PN, Oppermann H (1991) Murine osteogenic protein (OP-1): high levels of mRNA in kidney. *Biochem Biophys Res Commun* 179: 116–123.
- Blease K, Schuh JM, Jakubzick C, Lukacs NW, Kunkel SL, et al. (2002) Stat6-deficient mice develop airway hyperresponsiveness and peribronchial fibrosis during chronic fungal asthma. *Am J Pathol* 160: 481–490.
- Hogaboam CM, Bone-Larson CL, Lipinski S, Lukacs NW, Chensue SW, et al. (1999) Differential monocyte chemoattractant protein-1 and chemokine receptor 2 expression by murine lung fibroblasts derived from Th1- and Th2-type pulmonary granuloma models. *J Immunol* 163: 2193–2201.
